# Supplementary material
Source: PubMed Central journal article supplement (PMC2040885)

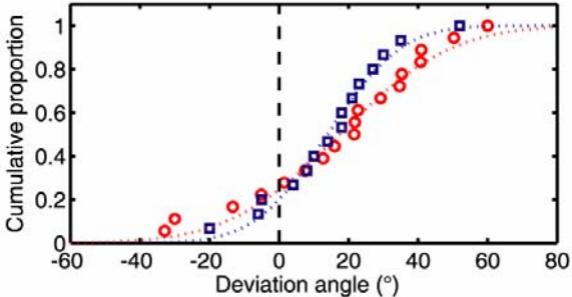

Supplement: pnas_0702536104_1.pdf [file pnas_0702536104_1.pdf]

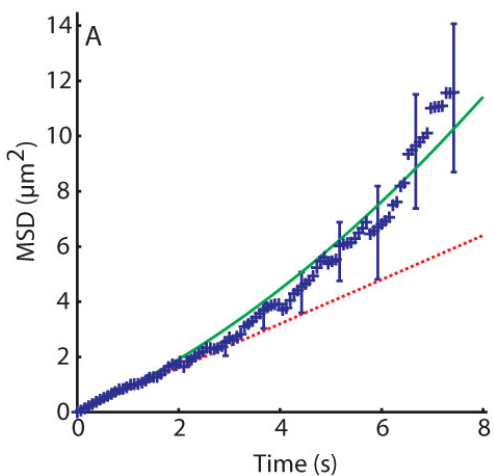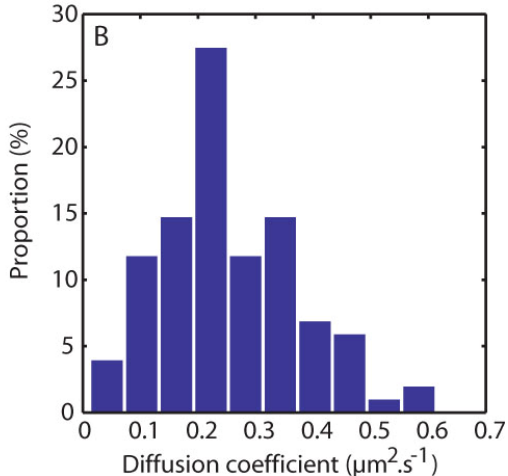

Supplement: pnas_0702536104_6.pdf [file pnas_0702536104_6.pdf]

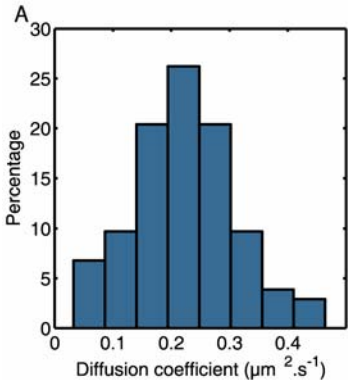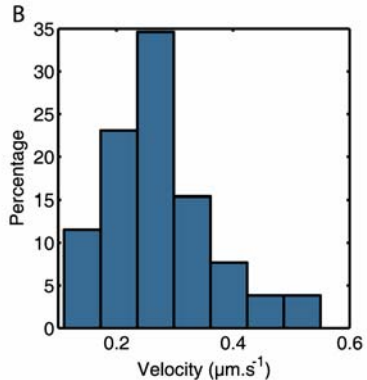

Supplement: pnas_0702536104_7.pdf [file pnas_0702536104_7.pdf]

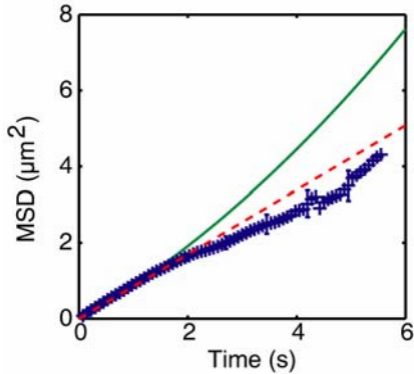

Supplement: pnas_0702536104_8.pdf [file pnas_0702536104_8.pdf]
